# Supplementary figures and images for: G-quartets as a self-assembled scaffold for circular porphyrin arrays
Source: Royal Society of Chemistry journal article supplement (doi:10.1039/b006160n), 2000-01-01

Tentative structure of the octameric complex, as evinced from preliminary data.


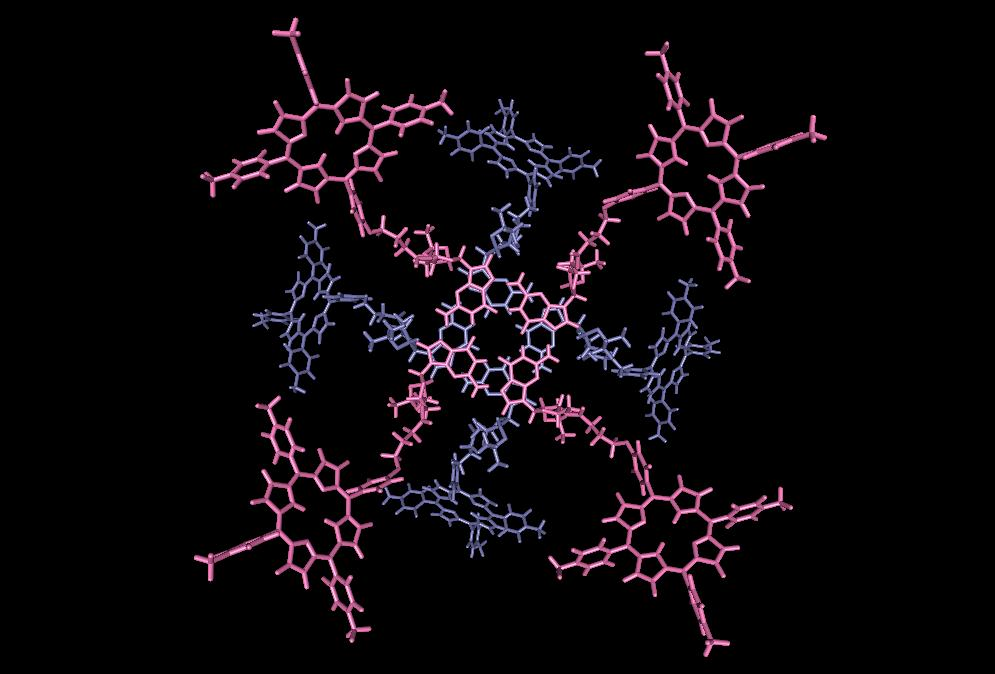

Supplement: b006160ns3.doc [file b006160ns3.doc]
